# Supplementary material for: Probing Raman enhancements for a colloidal metasurface with optical gap distances in the quantum regime
Source: Royal Society of Chemistry journal article supplement (doi:10.1039/d4lf00127c), 2024-01-01
Supplement: d4lf00127c1.pdf [file d4lf00127c1.pdf]

## Supporting Information

### Probing Raman Enhancements for a Colloidal Metasurface with Optical Gap Distances in the Quantum Regime

Yuan Zeng<sup>1,2\*</sup>, Yu Xie<sup>1\*</sup>, Andrea L. Rodarte<sup>1</sup>, Tyler J. Dill<sup>1</sup>, and Andrea R. Tao<sup>1,2‡</sup>

<sup>1</sup>Aiiso Yufeng Li Family Department of Chemical and Nano Engineering, University of California, San Diego, 9500 Gilman Drive MC 0448, La Jolla, California 92093-0448

<sup>2</sup>Materials Science and Engineering, University of California, San Diego, 9500 Gilman Drive, La Jolla, California 92093

\*These authors contributed equally to this work.

‡Email: atao@ucsd.edu

**Figure S1**

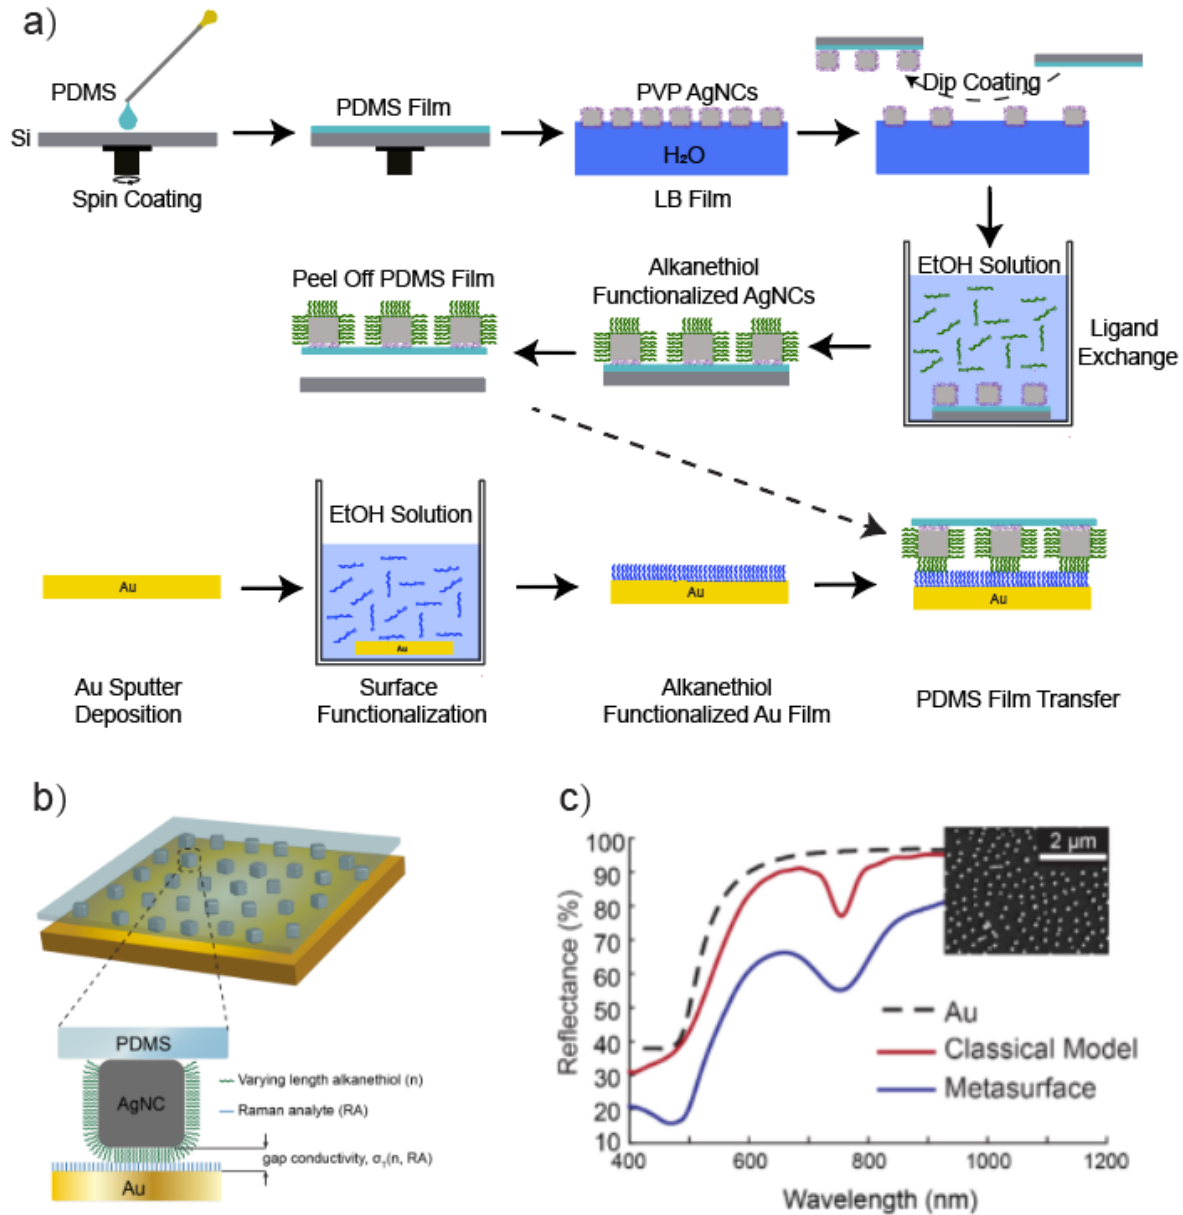

**Figure S1. Schematic and far field spectra of metasurface:** (a) Schematic of colloidal metasurface fabrication using PDMS stamping method (b) Schematic of a single meta-atom formed by AgNC and Au thin-film and separated by a dielectric gap consist of Raman analyte (dHDT) and alkanethiol (DDT). (c) Experimental (blue) reflectance spectra for an AgNC metasurface in classical regime ( $d = 3.27$  nm) and simulated (red) reflectance spectra with classical model ( $h = 3$  nm,  $\sigma_T = 0$ ). The inset shows an SEM image of AgNCs ( $73.6 \pm 3.7$  nm) deposited on PDMS prior to adhesion to an Au substrate, dashed line shows the reflectance spectra of PDMS adhered to Au with no AgNCs.

Due to the 150  $\mu\text{m}$  thick PDMS cap above the nanojunctions, we did not image the PDMS-AgNC on Au directly. However, because the gap mode resonance is identical to the AgNC on Au metasurface (Figure S1c), we believe the PDMS-AgNC nanojunction axes lie similarly in an out-of-plane direction where the AgNC flat facet in parallel to Au film.

**Table S1:** Raman Intensity (@ 999cm<sup>-1</sup>) vs. gap height

|         | h (nm) | Ex @ 633 nm | Ex @ 785 nm |
|---------|--------|-------------|-------------|
| Cn = 0  | 0.932  | 321.4       | 4228.2      |
| Cn = 1  | 1.058  | 9285.5      | 33035.5     |
| Cn = 2  | 1.184  | 16075.4     | 52462.3     |
| Cn = 3  | 1.31   | 48220.7     | 54790.3     |
| Cn = 4  | 1.436  | 26287.9     | 53766.9     |
| Cn = 6  | 1.688  | 17997.2     | 33594.2     |
| Cn = 8  | 1.94   | 12623.9     | 28294.7     |
| Cn = 12 | 2.444  | 5174.8      | 18247.1     |
| Cn = 16 | 2.948  | 684.5       | 4674.5      |
| Cn = 18 | 3.2    | 824.7       | 2863.0      |

**Figure S2**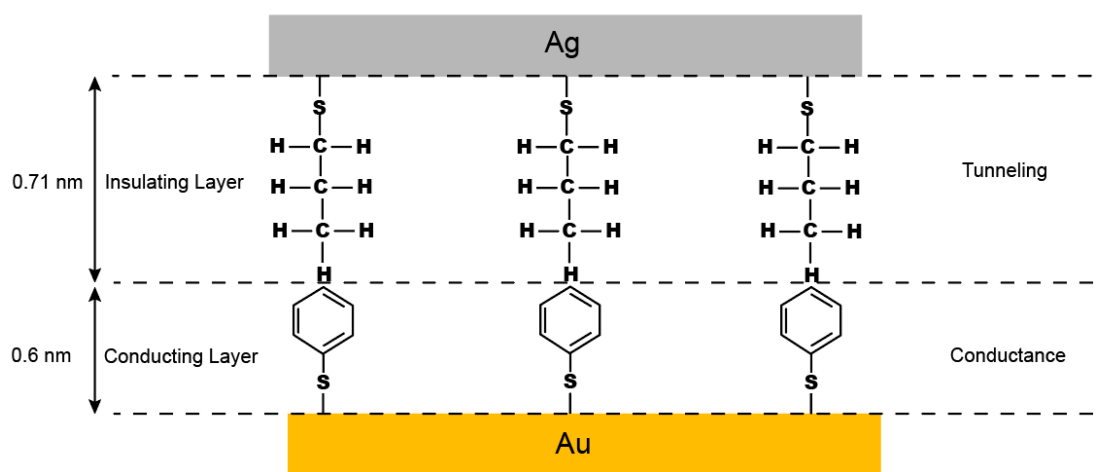**Figure S2. Schematic of Nanojunction**

A schematic of nanojunction (alkanethiol Cn = 3) is shown in Figure S2. The alkanethiol monolayer (Cn = 3) is 0.71 nm thick and the PhSH monolayer is 0.6 nm thick. This nanojunction can thus be approximated by a 0.71 nm thick insulating layer (alkanethiol) for which electron tunneling plays a dominant role in charge transfer and a 0.6 nm thick conductive layer (PhSH) for which conductance plays a dominant role due to  $\pi$ - $\pi$  stacking. However, it is not clear which charge transfer effect is more dominant in the overall nanojunction and would benefit from future studies on the fundamental physical mechanisms at play in these metasurface architectures.

**Figure S3**

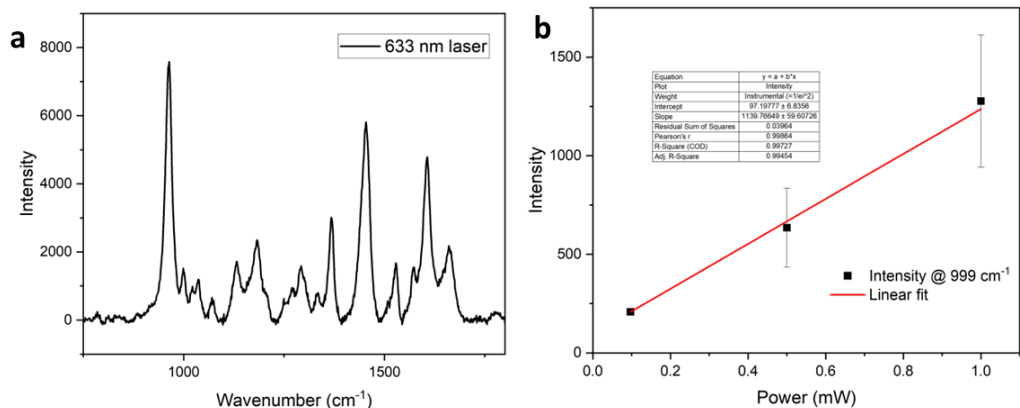

**Figure S3. mSERS measurements as a function of 633 nm laser power.** A) mSERS spectrum for a metasurface functionalized with benzenethiol. b) Plot of mSERS intensity at the 999 cm<sup>-1</sup> Raman band as a function of laser power showing a linear response.

**Figure S4**

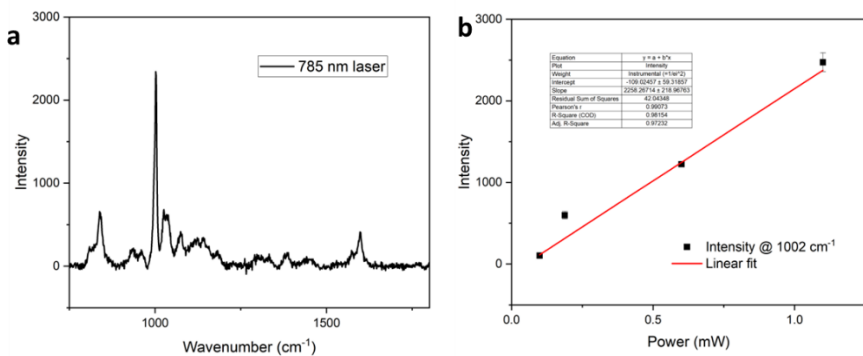

**Figure S4. mSERS measurements as a function of 785 nm laser power.** A) mSERS spectrum for a metasurface functionalized with benzenethiol. b) Plot of mSERS intensity at the 1002 cm<sup>-1</sup> Raman band as a function of laser power showing a linear response.
